# Supplementary material for: Changes Introduced in the Open Reading Frame of Bovine Viral Diarrhea Virus During Serial Infection of Pregnant Swine
Source: Front Microbiol. 2020 Jun 10;11:1138. doi: 10.3389/fmicb.2020.01138 (PMC7298064; doi:10.3389/fmicb.2020.01138)
Supplement: Supplementary file 2 [file Data_Sheet_2.xlsx]

## Sheet: Sheet1
ID	POSITION	REF	ALT	DP	AC	PCT		Changes Introduced in the Open Reading Frame of Bovine Viral Diarrhea Virus during Serial Infection of Pregnant Swine
AU526	1315	G	C	667	442	0.6627		Thibaud Kuca, Thomas Passler, Benjamin W. Newcomer, John D. Neill, Patricia K. Galik, Kay P. Riddell, Yijing Zhang, Darrell O. Bayles and Paul H. Walz
AU526	4881	G	T	889	523	0.5883		Supplementary Data Sheet: Single Nucleotide Polymorphism Analysis of the Virus Inoculum AU526
AU526	2917	T	C	1045	543	0.5196
AU526	2978	G	A	510	222	0.4353		REF = reference nucleotide
AU526	7524	T	C	520	226	0.4346		ALT = alternate nucleotide
AU526	1446	A	G	390	161	0.4128		DP = total number of sequences at that position
AU526	9851	G	A	1707	703	0.4118		AC = number of sequences of alternate nucleotide
AU526	5562	A	G	915	376	0.4109		PCT = percent of sequences of alternate nucleotide
AU526	783	C	T	3244	1278	0.394
AU526	10947	G	A	1228	483	0.3933
AU526	3194	C	G	559	210	0.3757
AU526	4701	A	G	522	180	0.3448
AU526	7120	G	A	245	74	0.302
AU526	4821	G	A	704	201	0.2855
AU526	1660	G	A	700	195	0.2786
AU526	5733	A	G	306	85	0.2778
AU526	7362	T	C	415	114	0.2747
AU526	3300	A	G	737	175	0.2374
AU526	11286	T	C	472	106	0.2246
AU526	8461	T	C	635	132	0.2079
AU526	5148	G	A	1393	282	0.2024
AU526	1226	A	G	812	162	0.1995
AU526	7309	A	T	277	54	0.1949
AU526	175	G	A	428	81	0.1893
AU526	3396	G	T	309	57	0.1845
AU526	6645	C	T	438	79	0.1804
AU526	4261	A	G	516	91	0.1764
AU526	1626	A	G	909	155	0.1705
AU526	2714	C	T	2025	345	0.1704
AU526	4653	G	A	420	66	0.1571
AU526	1330	G	T	637	99	0.1554
AU526	3206	T	A	608	93	0.153
AU526	9557	C	A	553	83	0.1501
AU526	1008	T	C	856	125	0.146
AU526	3437	G	A	234	34	0.1453
AU526	3369	G	C	367	52	0.1417
AU526	1342	A	G	569	75	0.1318
AU526	726	A	G	3685	475	0.1289
AU526	6168	T	C	2216	278	0.1255
AU526	4092	C	T	785	97	0.1236
AU526	2271	T	C	896	105	0.1172
AU526	4725	G	A	470	55	0.117
AU526	8078	A	G	283	33	0.1166
AU526	3422	A	G	251	29	0.1155
AU526	10710	G	T	383	44	0.1149
AU526	8184	A	G	489	55	0.1125
AU526	2182	G	C	851	89	0.1046
AU526	3792	G	A	344	34	0.0988
AU526	4716	T	C	516	50	0.0969
AU526	9170	T	A	465	45	0.0968
AU526	2246	C	T	1001	96	0.0959
AU526	2837	G	T	1338	128	0.0957
AU526	6978	T	A	505	48	0.095
AU526	3903	T	C	300	28	0.0933
AU526	11301	C	T	249	23	0.0924
AU526	1090	A	G	1120	103	0.092
AU526	1254	A	G	873	80	0.0916
AU526	6820	T	A	774	70	0.0904
AU526	8325	G	A	949	81	0.0854
AU526	6858	T	C	845	72	0.0852
AU526	8611	A	G	807	68	0.0843
AU526	10831	A	G	462	38	0.0823
AU526	2136	A	T	832	68	0.0817
AU526	1738	T	A	505	41	0.0812
AU526	2730	G	A	2004	161	0.0803
AU526	11603	T	C	25	2	0.08
AU526	2598	T	C	1133	88	0.0777
AU526	6205	T	C	1468	114	0.0777
AU526	2140	G	C	886	68	0.0767
AU526	1800	A	G	366	28	0.0765
AU526	8968	A	G	913	68	0.0745
AU526	3798	T	C	363	26	0.0716
AU526	1458	A	G	440	31	0.0705
AU526	4645	A	G	446	31	0.0695
AU526	7245	G	T	237	16	0.0675
AU526	2329	A	G	718	47	0.0655
AU526	247	T	C	461	30	0.0651
AU526	1125	G	A	931	58	0.0623
AU526	4959	A	T	896	55	0.0614
AU526	11094	T	C	1108	67	0.0605
AU526	978	T	C	764	46	0.0602
AU526	2831	C	A	1387	83	0.0598
AU526	10530	G	A	273	16	0.0586
AU526	9289	G	T	890	52	0.0584
AU526	1203	T	A	884	50	0.0566
AU526	6270	T	C	462	26	0.0563
AU526	6996	A	G	500	28	0.056
AU526	8877	T	A	691	38	0.055
AU526	8511	A	G	437	24	0.0549
AU526	1269	G	A	799	43	0.0538
AU526	2940	G	T	743	40	0.0538
AU526	7761	A	G	325	17	0.0523
AU526	6486	G	A	709	37	0.0522
AU526	9876	A	G	1702	88	0.0517
AU526	9175	G	C	467	23	0.0493
AU526	53	C	A	183	9	0.0492
AU526	4378	G	A	593	29	0.0489
AU526	10244	C	T	3528	172	0.0488
AU526	10542	A	G	296	14	0.0473
AU526	3962	A	G	341	16	0.0469
AU526	5320	G	A	5448	254	0.0466
AU526	5679	A	G	279	13	0.0466
AU526	1973	C	A	281	13	0.0463
AU526	6009	A	G	1197	55	0.0459
AU526	2778	T	C	1906	86	0.0451
AU526	7836	A	G	268	12	0.0448
AU526	4956	C	T	858	38	0.0443
AU526	7809	G	A	271	12	0.0443
AU526	2276	C	T	874	38	0.0435
AU526	1742	T	A	467	20	0.0428
AU526	10245	G	A	3532	150	0.0425
AU526	2505	C	A	532	22	0.0414
AU526	11289	A	G	417	17	0.0408
AU526	2526	A	G	739	30	0.0406
AU526	393	T	C	710	28	0.0394
AU526	10941	A	G	1131	44	0.0389
AU526	5181	G	A	1620	62	0.0383
AU526	2562	C	T	903	34	0.0377
AU526	6372	A	G	701	26	0.0371
AU526	11601	A	G	27	1	0.037
AU526	8805	A	G	738	27	0.0366
AU526	8164	A	C	440	16	0.0364
AU526	8777	A	T	561	20	0.0357
AU526	11511	C	T	141	5	0.0355
AU526	2520	A	G	680	24	0.0353
AU526	7105	G	A	256	9	0.0352
AU526	5629	A	G	342	12	0.0351
AU526	6511	T	C	569	20	0.0351
AU526	1129	C	T	1008	35	0.0347
AU526	8161	C	A	434	15	0.0346
AU526	11597	C	T	29	1	0.0345
AU526	5862	G	A	329	11	0.0334
AU526	8088	T	A	299	10	0.0334
AU526	11034	T	C	1527	51	0.0334
AU526	10917	A	G	1056	35	0.0331
AU526	11490	G	A	151	5	0.0331
AU526	2143	G	T	912	30	0.0329
AU526	4456	A	G	615	20	0.0325
AU526	7440	C	T	461	15	0.0325
AU526	5817	T	A	339	11	0.0324
AU526	740	G	T	3750	121	0.0323
AU526	11544	A	G	94	3	0.0319
AU526	8104	G	A	254	8	0.0315
AU526	9760	C	T	1049	33	0.0315
AU526	10248	G	T	3555	111	0.0312
AU526	2148	A	G	902	28	0.031
AU526	6255	T	C	876	27	0.0308
AU526	7788	T	C	325	10	0.0308
AU526	9879	A	G	1686	52	0.0308
AU526	2676	G	A	1660	50	0.0301
AU526	6891	T	C	755	22	0.0291
AU526	7827	G	A	275	8	0.0291
AU526	423	T	C	623	18	0.0289
AU526	4020	A	G	558	16	0.0287
AU526	10959	C	T	1223	35	0.0286
AU526	8838	T	C	829	23	0.0277
AU526	6114	G	T	1967	54	0.0275
AU526	1327	A	G	640	17	0.0266
AU526	8604	G	A	799	21	0.0263
AU526	6087	A	G	2060	53	0.0257
AU526	10454	T	C	742	19	0.0256
AU526	7845	G	A	275	7	0.0255
AU526	2551	G	A	838	21	0.0251
AU526	5961	G	A	851	21	0.0247
AU526	2439	A	G	368	9	0.0245
AU526	27	A	G	164	4	0.0244
AU526	8454	A	G	655	16	0.0244
AU526	8119	G	A	331	8	0.0242
AU526	2999	T	A	374	9	0.0241
AU526	7034	T	C	424	10	0.0236
AU526	7250	T	A	254	6	0.0236
AU526	7623	A	G	466	11	0.0236
AU526	213	G	A	425	10	0.0235
AU526	9315	C	T	985	23	0.0234
AU526	2799	C	T	1676	39	0.0233
AU526	8541	C	T	473	11	0.0233
AU526	1003	A	G	820	19	0.0232
AU526	1435	G	A	390	9	0.0231
AU526	4236	A	G	563	13	0.0231
AU526	4781	G	A	567	13	0.0229
AU526	10440	A	G	2011	46	0.0229
AU526	1701	T	G	615	14	0.0228
AU526	3414	A	G	265	6	0.0226
AU526	3006	T	C	267	6	0.0225
AU526	1049	G	T	947	21	0.0222
AU526	8195	A	G	586	13	0.0222
AU526	1848	T	C	317	7	0.0221
AU526	3650	G	A	678	15	0.0221
AU526	6819	C	A	769	17	0.0221
AU526	1866	A	G	318	7	0.022
AU526	4743	A	G	504	11	0.0218
AU526	444	T	C	603	13	0.0216
AU526	11288	A	G	462	10	0.0216
AU526	3571	G	A	465	10	0.0215
AU526	7692	G	A	419	9	0.0215
AU526	921	C	A	1586	34	0.0214
AU526	5007	T	C	1173	25	0.0213
AU526	2379	C	T	472	10	0.0212
AU526	10555	G	A	283	6	0.0212
AU526	595	T	G	2366	50	0.0211
AU526	2244	A	T	1003	21	0.0209
AU526	5163	C	T	1532	32	0.0209
AU526	10236	A	G	3630	76	0.0209
AU526	10455	G	A	682	14	0.0205
AU526	2393	G	T	347	7	0.0202
AU526	7419	C	T	448	9	0.0201
AU526	8670	C	T	752	15	0.0199
AU526	2985	A	G	454	9	0.0198
AU526	3120	A	T	405	8	0.0198
AU526	7923	T	C	253	5	0.0198
AU526	7980	G	A	303	6	0.0198
AU526	7125	C	T	254	5	0.0197
AU526	7860	C	T	254	5	0.0197
AU526	10686	T	C	355	7	0.0197
AU526	3487	A	G	306	6	0.0196
AU526	8169	C	T	462	9	0.0195
AU526	2177	C	T	926	18	0.0194
AU526	11478	C	A	155	3	0.0194
AU526	7435	A	G	468	9	0.0192
AU526	10463	A	G	417	8	0.0192
AU526	8037	G	T	318	6	0.0189
AU526	11322	A	G	264	5	0.0189
AU526	10669	G	A	319	6	0.0188
AU526	3463	A	G	268	5	0.0187
AU526	7047	G	A	375	7	0.0187
AU526	9072	T	A	749	14	0.0187
AU526	10872	C	A	645	12	0.0186
AU526	30	C	T	163	3	0.0184
AU526	975	C	T	815	15	0.0184
AU526	7854	A	C	272	5	0.0184
AU526	9051	C	A	767	14	0.0183
AU526	10587	C	T	328	6	0.0183
AU526	4478	G	A	550	10	0.0182
AU526	10332	G	A	4746	86	0.0181
AU526	10407	T	C	2756	50	0.0181
AU526	10458	G	A	552	10	0.0181
AU526	7257	T	C	278	5	0.018
AU526	7863	A	G	279	5	0.0179
AU526	5661	A	G	283	5	0.0177
AU526	5630	T	G	340	6	0.0176
AU526	7734	G	A	341	6	0.0176
AU526	9376	G	A	909	16	0.0176
AU526	2715	T	A	2061	36	0.0175
AU526	5121	A	G	1430	25	0.0175
AU526	7976	A	T	286	5	0.0175
AU526	11444	T	C	171	3	0.0175
AU526	7509	A	G	517	9	0.0174
AU526	2397	C	T	346	6	0.0173
AU526	7350	T	C	346	6	0.0173
AU526	8819	C	G	750	13	0.0173
AU526	5016	T	C	1229	21	0.0171
AU526	1803	A	G	353	6	0.017
AU526	2406	C	T	352	6	0.017
AU526	4368	C	T	595	10	0.0168
AU526	437	A	G	600	10	0.0167
AU526	5217	A	G	3168	53	0.0167
AU526	3837	A	G	302	5	0.0166
AU526	7086	G	A	301	5	0.0166
AU526	7212	A	G	241	4	0.0166
AU526	10041	G	A	1215	20	0.0165
AU526	10451	G	A	1150	19	0.0165
AU526	1096	A	G	1103	18	0.0163
AU526	1585	G	A	859	14	0.0163
AU526	5787	T	C	306	5	0.0163
AU526	9640	C	T	491	8	0.0163
AU526	9831	G	T	1659	27	0.0163
AU526	7803	G	A	309	5	0.0162
AU526	10450	T	C	1170	19	0.0162
AU526	11374	C	T	247	4	0.0162
AU526	11332	T	C	249	4	0.0161
AU526	89	A	G	250	4	0.016
AU526	3418	G	A	250	4	0.016
AU526	7188	C	T	250	4	0.016
AU526	10870	G	T	625	10	0.016
AU526	5193	T	C	1944	31	0.0159
AU526	6522	T	A	504	8	0.0159
AU526	2385	C	T	444	7	0.0158
AU526	3902	T	A	317	5	0.0158
AU526	10605	A	G	316	5	0.0158
AU526	9198	G	A	509	8	0.0157
AU526	1299	T	C	767	12	0.0156
AU526	7110	C	T	256	4	0.0156
AU526	1245	C	A	904	14	0.0155
AU526	1467	T	C	452	7	0.0155
AU526	2998	T	C	386	6	0.0155
AU526	3672	A	G	710	11	0.0155
AU526	8116	A	T	258	4	0.0155
AU526	8971	T	A	901	14	0.0155
AU526	915	A	G	1562	24	0.0154
AU526	7387	G	T	454	7	0.0154
AU526	9301	T	A	972	15	0.0154
AU526	10680	C	T	325	5	0.0154
AU526	11529	C	T	130	2	0.0154
AU526	7356	T	C	392	6	0.0153
AU526	9673	A	G	655	10	0.0153
AU526	7117	A	G	264	4	0.0152
AU526	9318	A	T	989	15	0.0152
AU526	11568	T	C	66	1	0.0152
AU526	2484	G	A	332	5	0.0151
AU526	6318	A	G	530	8	0.0151
AU526	3037	A	C	266	4	0.015
AU526	5448	A	G	3995	60	0.015
AU526	6609	C	T	399	6	0.015
AU526	7543	A	T	468	7	0.015
AU526	7873	G	T	267	4	0.015
AU526	1448	A	G	402	6	0.0149
AU526	3060	T	C	269	4	0.0149
AU526	6642	T	C	402	6	0.0149
AU526	7264	G	A	271	4	0.0148
AU526	7602	T	C	474	7	0.0148
AU526	7842	A	T	270	4	0.0148
AU526	1890	A	G	272	4	0.0147
AU526	11290	G	A	407	6	0.0147
AU526	8433	G	A	756	11	0.0146
AU526	10614	A	G	346	5	0.0145
AU526	2338	G	A	693	10	0.0144
AU526	10453	G	A	905	13	0.0144
AU526	11431	A	G	210	3	0.0143
AU526	4659	A	G	422	6	0.0142
AU526	4899	A	T	918	13	0.0142
AU526	7486	T	G	494	7	0.0142
AU526	10002	C	A	1206	17	0.0141
AU526	125	A	T	286	4	0.014
AU526	1453	C	T	429	6	0.014
AU526	5639	G	C	285	4	0.014
AU526	194	A	G	432	6	0.0139
AU526	5229	C	T	3459	48	0.0139
AU526	7452	C	T	504	7	0.0139
AU526	11563	C	A	72	1	0.0139
AU526	3876	C	T	290	4	0.0138
AU526	4150	T	C	654	9	0.0138
AU526	5645	C	A	292	4	0.0137
AU526	10560	T	C	292	4	0.0137
AU526	912	G	A	1544	21	0.0136
AU526	5088	C	T	1327	18	0.0136
AU526	3907	A	G	297	4	0.0135
AU526	3921	T	C	296	4	0.0135
AU526	4078	A	G	742	10	0.0135
AU526	5784	A	G	297	4	0.0135
AU526	6265	C	G	742	10	0.0135
AU526	1554	T	C	821	11	0.0134
AU526	3068	A	G	299	4	0.0134
AU526	6474	G	A	671	9	0.0134
AU526	8988	G	T	896	12	0.0134
AU526	10014	A	G	1266	17	0.0134
AU526	10704	C	T	373	5	0.0134
AU526	2494	T	C	451	6	0.0133
AU526	6264	A	G	752	10	0.0133
AU526	11515	T	C	150	2	0.0133
AU526	11556	T	G	75	1	0.0133
AU526	11561	A	T	75	1	0.0133
AU526	330	T	C	684	9	0.0132
AU526	508	G	T	1057	14	0.0132
AU526	2451	C	T	304	4	0.0132
AU526	3442	G	T	228	3	0.0132
AU526	4230	A	G	605	8	0.0132
AU526	6888	C	T	755	10	0.0132
AU526	4260	G	T	536	7	0.0131
AU526	5764	G	C	307	4	0.013
AU526	9927	T	C	1544	20	0.013
AU526	10113	T	C	1845	24	0.013
AU526	11184	C	T	772	10	0.013
AU526	2382	T	C	465	6	0.0129
AU526	2853	A	C	1317	17	0.0129
AU526	3925	T	C	311	4	0.0129
AU526	11353	G	T	233	3	0.0129
AU526	2380	G	T	467	6	0.0128
AU526	6060	G	A	1802	23	0.0128
AU526	2852	T	A	1343	17	0.0127
AU526	3436	C	A	237	3	0.0127
AU526	7153	A	G	237	3	0.0127
AU526	11305	G	A	237	3	0.0127
AU526	989	C	T	712	9	0.0126
AU526	2403	A	G	318	4	0.0126
AU526	3822	T	C	318	4	0.0126
AU526	4983	C	T	874	11	0.0126
AU526	5849	G	T	319	4	0.0125
AU526	6758	A	T	558	7	0.0125
AU526	7801	C	T	319	4	0.0125
AU526	11491	C	T	160	2	0.0125
AU526	160	C	A	404	5	0.0124
AU526	3626	C	T	647	8	0.0124
AU526	7146	C	T	241	3	0.0124
AU526	1767	A	C	407	5	0.0123
AU526	3420	C	T	243	3	0.0123
AU526	4153	C	T	649	8	0.0123
AU526	6610	C	A	406	5	0.0123
AU526	10333	A	T	4708	58	0.0123
AU526	10602	T	C	324	4	0.0123
AU526	11454	G	A	163	2	0.0123
AU526	1491	A	G	576	7	0.0122
AU526	2163	G	A	982	12	0.0122
AU526	3828	A	G	328	4	0.0122
AU526	9053	G	A	737	9	0.0122
AU526	9108	A	G	656	8	0.0122
AU526	264	G	T	497	6	0.0121
AU526	432	T	C	577	7	0.0121
AU526	4608	A	G	496	6	0.0121
AU526	10899	A	G	910	11	0.0121
AU526	4878	T	C	832	10	0.012
AU526	6342	A	G	581	7	0.012
AU526	6578	A	G	417	5	0.012
AU526	7698	C	A	416	5	0.012
AU526	7785	G	C	333	4	0.012
AU526	7937	G	T	251	3	0.012
AU526	2211	A	T	926	11	0.0119
AU526	6889	G	A	758	9	0.0119
AU526	10452	G	A	1006	12	0.0119
AU526	132	G	A	339	4	0.0118
AU526	3804	A	G	340	4	0.0118
AU526	3942	C	G	338	4	0.0118
AU526	8106	C	T	254	3	0.0118
AU526	11221	A	G	677	8	0.0118
AU526	313	C	T	598	7	0.0117
AU526	349	A	G	684	8	0.0117
AU526	1983	A	T	341	4	0.0117
AU526	2656	G	A	1449	17	0.0117
AU526	6963	C	T	515	6	0.0117
AU526	1420	C	T	346	4	0.0116
AU526	3039	G	A	258	3	0.0116
AU526	1482	G	A	520	6	0.0115
AU526	3592	C	T	524	6	0.0115
AU526	4737	T	A	434	5	0.0115
AU526	6653	A	T	436	5	0.0115
AU526	7202	G	T	260	3	0.0115
AU526	7290	G	T	262	3	0.0115
AU526	7743	C	T	349	4	0.0115
AU526	8114	G	A	260	3	0.0115
AU526	2607	C	T	1232	14	0.0114
AU526	5631	G	A	351	4	0.0114
AU526	7731	C	T	351	4	0.0114
AU526	7913	T	C	264	3	0.0114
AU526	8162	C	G	439	5	0.0114
AU526	10102	T	C	1664	19	0.0114
AU526	1469	A	G	443	5	0.0113
AU526	1987	A	G	353	4	0.0113
AU526	3464	C	T	266	3	0.0113
AU526	5846	C	T	353	4	0.0113
AU526	9036	G	A	709	8	0.0113
AU526	10473	G	T	355	4	0.0113
AU526	5694	G	T	269	3	0.0112
AU526	6268	G	T	538	6	0.0112
AU526	7386	G	A	445	5	0.0112
AU526	7422	C	T	446	5	0.0112
AU526	8466	T	C	627	7	0.0112
AU526	10053	G	T	1423	16	0.0112
AU526	11547	A	G	89	1	0.0112
AU526	1917	G	T	271	3	0.0111
AU526	1920	C	T	270	3	0.0111
AU526	3732	A	G	633	7	0.0111
AU526	7293	G	A	271	3	0.0111
AU526	52	T	G	182	2	0.011
AU526	931	G	A	1461	16	0.011
AU526	9399	G	A	1001	11	0.011
AU526	113	T	A	276	3	0.0109
AU526	400	T	C	645	7	0.0109
AU526	4476	T	C	549	6	0.0109
AU526	6285	G	A	460	5	0.0109
AU526	6708	C	A	549	6	0.0109
AU526	7137	T	C	274	3	0.0109
AU526	7838	A	G	276	3	0.0109
AU526	8539	G	T	459	5	0.0109
AU526	8763	A	C	550	6	0.0109
AU526	8913	G	A	736	8	0.0109
AU526	9546	G	T	551	6	0.0109
AU526	288	C	T	556	6	0.0108
AU526	4051	A	T	649	7	0.0108
AU526	5662	T	G	278	3	0.0108
AU526	7039	G	A	372	4	0.0108
AU526	7048	G	A	370	4	0.0108
AU526	10023	T	A	1297	14	0.0108
AU526	10461	G	A	462	5	0.0108
AU526	1310	A	G	751	8	0.0107
AU526	1871	A	G	281	3	0.0107
AU526	1958	T	C	281	3	0.0107
AU526	2680	A	G	1773	19	0.0107
AU526	8463	A	T	657	7	0.0107
AU526	3537	G	T	378	4	0.0106
AU526	6552	C	T	470	5	0.0106
AU526	8871	A	G	755	8	0.0106
AU526	692	A	G	4004	42	0.0105
AU526	1972	A	G	286	3	0.0105
AU526	2497	A	G	478	5	0.0105
AU526	3843	C	T	287	3	0.0105
AU526	7830	A	C	286	3	0.0105
AU526	8214	T	C	760	8	0.0105
AU526	10823	G	T	474	5	0.0105
AU526	120	T	C	289	3	0.0104
AU526	981	G	T	676	7	0.0104
AU526	1885	G	C	289	3	0.0104
AU526	2187	G	A	868	9	0.0104
AU526	2580	C	T	962	10	0.0104
AU526	3471	C	T	288	3	0.0104
AU526	3474	A	G	288	3	0.0104
AU526	4023	T	C	578	6	0.0104
AU526	5612	A	G	483	5	0.0104
AU526	6263	A	G	769	8	0.0104
AU526	7434	C	T	482	5	0.0104
AU526	8570	G	A	577	6	0.0104
AU526	3693	T	C	682	7	0.0103
AU526	5553	A	G	871	9	0.0103
AU526	6835	T	C	774	8	0.0103
AU526	7535	C	T	484	5	0.0103
AU526	7911	C	T	292	3	0.0103
AU526	8085	A	G	291	3	0.0103
AU526	9327	T	C	1068	11	0.0103
AU526	10470	A	G	389	4	0.0103
AU526	3865	A	G	293	3	0.0102
AU526	5555	T	A	880	9	0.0102
AU526	5982	G	A	983	10	0.0102
AU526	8077	T	C	295	3	0.0102
AU526	3605	T	C	597	6	0.0101
AU526	7641	G	A	494	5	0.0101
AU526	8142	A	G	395	4	0.0101
AU526	8962	G	A	891	9	0.0101
AU526	11404	T	C	199	2	0.0101
AU526	11412	A	G	198	2	0.0101
AU526	3544	A	G	401	4	0.01
AU526	4470	T	C	603	6	0.01
AU526	4610	C	T	501	5	0.01
AU526	4702	A	C	498	5	0.01
AU526	10572	C	T	300	3	0.01
AU526	10754	G	T	400	4	0.01
AU526	11414	A	G	201	2	0.01
AU526	155	G	T	404	4	0.0099
AU526	6525	C	A	506	5	0.0099
AU526	10456	A	C	607	6	0.0099
AU526	2463	T	C	307	3	0.0098
AU526	2739	C	T	2048	20	0.0098
AU526	3399	G	T	307	3	0.0098
AU526	4224	G	A	611	6	0.0098
AU526	6261	T	A	813	8	0.0098
AU526	6603	G	A	408	4	0.0098
AU526	7070	A	G	307	3	0.0098
AU526	7323	C	T	306	3	0.0098
AU526	7561	C	A	510	5	0.0098
AU526	8025	C	T	305	3	0.0098
AU526	10086	A	G	1525	15	0.0098
AU526	11049	T	C	1322	13	0.0098
AU526	11406	G	A	204	2	0.0098
AU526	1449	A	G	412	4	0.0097
AU526	2855	G	A	1334	13	0.0097
AU526	3741	A	G	518	5	0.0097
AU526	6582	T	C	414	4	0.0097
AU526	6615	A	G	413	4	0.0097
AU526	10763	A	G	412	4	0.0097
AU526	3883	C	T	314	3	0.0096
AU526	3988	A	G	417	4	0.0096
AU526	4944	G	A	830	8	0.0096
AU526	5765	T	C	311	3	0.0096
AU526	7998	C	A	313	3	0.0096
AU526	10652	A	G	313	3	0.0096
AU526	11142	A	G	934	9	0.0096
AU526	11403	C	A	208	2	0.0096
AU526	998	A	G	734	7	0.0095
AU526	3927	G	A	315	3	0.0095
AU526	7771	C	T	317	3	0.0095
AU526	8059	T	G	315	3	0.0095
AU526	9474	T	A	630	6	0.0095
AU526	10028	G	A	1263	12	0.0095
AU526	2593	A	G	1059	10	0.0094
AU526	3513	G	A	320	3	0.0094
AU526	5859	C	T	320	3	0.0094
AU526	10197	A	G	2446	23	0.0094
AU526	11100	T	C	1174	11	0.0094
AU526	1452	A	G	429	4	0.0093
AU526	3154	C	T	429	4	0.0093
AU526	7994	T	G	324	3	0.0093
AU526	8496	T	C	430	4	0.0093
AU526	1213	T	C	869	8	0.0092
AU526	1277	A	G	760	7	0.0092
AU526	5827	G	A	327	3	0.0092
AU526	6006	T	C	1192	11	0.0092
AU526	7791	A	G	325	3	0.0092
AU526	10581	T	C	327	3	0.0092
AU526	2102	C	T	875	8	0.0091
AU526	4212	T	C	552	5	0.0091
AU526	5712	T	C	328	3	0.0091
AU526	5830	G	A	329	3	0.0091
AU526	10586	A	G	328	3	0.0091
AU526	10640	A	G	330	3	0.0091
AU526	10868	A	G	548	5	0.0091
AU526	1275	C	T	780	7	0.009
AU526	2475	A	T	335	3	0.009
AU526	2506	A	G	554	5	0.009
AU526	2559	T	C	885	8	0.009
AU526	3834	G	T	332	3	0.009
AU526	5861	C	A	333	3	0.009
AU526	6663	G	T	444	4	0.009
AU526	6825	C	T	774	7	0.009
AU526	9584	C	A	557	5	0.009
AU526	10985	A	G	1329	12	0.009
AU526	1416	T	C	337	3	0.0089
AU526	1815	A	G	338	3	0.0089
AU526	6750	C	T	562	5	0.0089
AU526	7385	G	T	447	4	0.0089
AU526	9807	T	C	1349	12	0.0089
AU526	369	T	C	684	6	0.0088
AU526	2146	A	G	913	8	0.0088
AU526	7156	T	C	228	2	0.0088
AU526	7730	C	A	341	3	0.0088
AU526	9623	T	C	570	5	0.0088
AU526	10700	C	A	341	3	0.0088
AU526	261	G	A	461	4	0.0087
AU526	1710	C	T	576	5	0.0087
AU526	3002	A	G	343	3	0.0087
AU526	3443	A	G	229	2	0.0087
AU526	4205	C	T	575	5	0.0087
AU526	6549	T	C	458	4	0.0087
AU526	6551	A	G	458	4	0.0087
AU526	6738	T	C	577	5	0.0087
AU526	7238	T	A	231	2	0.0087
AU526	10362	A	G	4275	37	0.0087
AU526	10728	C	T	461	4	0.0087
AU526	706	T	C	4321	37	0.0086
AU526	1809	A	T	347	3	0.0086
AU526	3024	A	G	233	2	0.0086
AU526	3690	T	C	701	6	0.0086
AU526	4147	G	T	694	6	0.0086
AU526	4731	A	G	467	4	0.0086
AU526	5536	A	C	1284	11	0.0086
AU526	5976	T	C	933	8	0.0086
AU526	6090	G	A	2084	18	0.0086
AU526	6287	T	C	463	4	0.0086
AU526	6743	G	T	579	5	0.0086
AU526	7160	T	C	233	2	0.0086
AU526	10781	G	T	463	4	0.0086
AU526	10858	G	T	467	4	0.0086
AU526	11140	G	A	934	8	0.0086
AU526	11392	A	G	232	2	0.0086
AU526	501	C	T	938	8	0.0085
AU526	1404	A	C	354	3	0.0085
AU526	1473	C	G	470	4	0.0085
AU526	3977	G	T	353	3	0.0085
AU526	4165	T	A	590	5	0.0085
AU526	5210	C	A	2476	21	0.0085
AU526	5868	A	G	351	3	0.0085
AU526	6919	G	T	707	6	0.0085
AU526	6989	A	G	471	4	0.0085
AU526	7221	G	A	235	2	0.0085
AU526	8136	C	T	355	3	0.0085
AU526	8139	A	G	354	3	0.0085
AU526	9186	T	C	473	4	0.0085
AU526	1398	G	T	359	3	0.0084
AU526	1422	G	A	359	3	0.0084
AU526	2611	T	C	1431	12	0.0084
AU526	3966	T	C	357	3	0.0084
AU526	6487	A	G	714	6	0.0084
AU526	7206	G	A	238	2	0.0084
AU526	7569	C	T	476	4	0.0084
AU526	9088	A	G	713	6	0.0084
AU526	10812	C	T	476	4	0.0084
AU526	11395	T	C	237	2	0.0084
AU526	219	T	C	482	4	0.0083
AU526	266	T	G	482	4	0.0083
AU526	506	C	G	965	8	0.0083
AU526	1427	G	A	362	3	0.0083
AU526	2195	G	A	848	7	0.0083
AU526	4818	C	T	726	6	0.0083
AU526	6692	C	T	481	4	0.0083
AU526	6693	C	A	481	4	0.0083
AU526	7008	A	G	483	4	0.0083
AU526	8181	G	T	484	4	0.0083
AU526	10811	C	T	484	4	0.0083
AU526	10834	C	T	484	4	0.0083
AU526	11393	C	A	240	2	0.0083
AU526	534	A	G	1342	11	0.0082
AU526	973	C	G	855	7	0.0082
AU526	1719	G	A	609	5	0.0082
AU526	1749	A	G	488	4	0.0082
AU526	2326	T	C	729	6	0.0082
AU526	2391	G	A	364	3	0.0082
AU526	2513	A	G	607	5	0.0082
AU526	6462	G	A	730	6	0.0082
AU526	6504	T	A	612	5	0.0082
AU526	6535	A	G	485	4	0.0082
AU526	6687	C	T	488	4	0.0082
AU526	7548	T	C	486	4	0.0082
AU526	7707	C	A	366	3	0.0082
AU526	7709	T	G	366	3	0.0082
AU526	9173	T	C	490	4	0.0082
AU526	10279	T	C	4017	33	0.0082
AU526	10797	A	G	487	4	0.0082
AU526	11125	C	T	977	8	0.0082
AU526	11346	A	G	243	2	0.0082
AU526	11359	G	A	245	2	0.0082
AU526	11370	T	C	243	2	0.0082
AU526	1170	T	C	869	7	0.0081
AU526	4414	A	G	614	5	0.0081
AU526	4787	A	G	615	5	0.0081
AU526	6321	T	C	492	4	0.0081
AU526	6993	T	A	495	4	0.0081
AU526	7891	C	A	246	2	0.0081
AU526	9507	A	G	615	5	0.0081
AU526	9639	G	A	494	4	0.0081
AU526	9839	T	C	1597	13	0.0081
AU526	11300	T	C	246	2	0.0081
AU526	11342	T	C	246	2	0.0081
AU526	305	C	A	627	5	0.008
AU526	3010	G	A	249	2	0.008
AU526	3330	T	C	748	6	0.008
AU526	3416	G	A	251	2	0.008
AU526	4911	A	G	876	7	0.008
AU526	5100	C	T	1377	11	0.008
AU526	5873	T	C	376	3	0.008
AU526	6608	T	C	377	3	0.008
AU526	7038	A	G	373	3	0.008
AU526	7938	G	T	250	2	0.008
AU526	9149	A	G	502	4	0.008
AU526	11336	G	T	249	2	0.008
AU526	1140	T	C	891	7	0.0079
AU526	2596	A	G	1133	9	0.0079
AU526	3007	A	G	252	2	0.0079
AU526	4047	G	A	635	5	0.0079
AU526	4502	C	T	633	5	0.0079
AU526	5211	A	G	2783	22	0.0079
AU526	6498	C	T	629	5	0.0079
AU526	6632	T	C	382	3	0.0079
AU526	6695	T	C	506	4	0.0079
AU526	6874	T	C	758	6	0.0079
AU526	6885	A	G	760	6	0.0079
AU526	7894	T	C	254	2	0.0079
AU526	7947	A	G	253	2	0.0079
AU526	9115	A	T	636	5	0.0079
AU526	9291	G	T	888	7	0.0079
AU526	9609	T	C	509	4	0.0079
AU526	11315	A	G	252	2	0.0079
AU526	11534	G	A	127	1	0.0079
AU526	1163	G	A	896	7	0.0078
AU526	1247	T	C	895	7	0.0078
AU526	1906	T	G	258	2	0.0078
AU526	3032	T	A	257	2	0.0078
AU526	3541	A	T	385	3	0.0078
AU526	4745	A	G	511	4	0.0078
AU526	4751	T	C	515	4	0.0078
AU526	5124	C	T	1409	11	0.0078
AU526	6882	A	G	770	6	0.0078
AU526	7476	C	T	512	4	0.0078
AU526	7695	A	G	386	3	0.0078
AU526	7858	G	A	257	2	0.0078
AU526	8113	A	G	258	2	0.0078
AU526	9164	G	A	515	4	0.0078
AU526	693	T	C	3899	30	0.0077
AU526	3424	G	C	260	2	0.0077
AU526	3740	T	G	522	4	0.0077
AU526	4052	G	A	653	5	0.0077
AU526	4117	A	G	783	6	0.0077
AU526	4419	A	G	652	5	0.0077
AU526	5953	G	T	776	6	0.0077
AU526	6594	A	G	389	3	0.0077
AU526	6627	G	T	390	3	0.0077
AU526	6899	T	G	775	6	0.0077
AU526	7704	T	C	392	3	0.0077
AU526	9350	T	C	906	7	0.0077
AU526	10468	G	T	388	3	0.0077
AU526	1533	C	T	792	6	0.0076
AU526	3431	T	C	262	2	0.0076
AU526	3591	C	T	524	4	0.0076
AU526	4896	A	T	922	7	0.0076
AU526	5157	A	G	1310	10	0.0076
AU526	5517	A	G	1852	14	0.0076
AU526	7111	G	C	262	2	0.0076
AU526	8853	A	G	794	6	0.0076
AU526	9357	C	T	925	7	0.0076
AU526	9628	A	G	529	4	0.0076
AU526	10914	A	G	1050	8	0.0076
AU526	11328	G	A	263	2	0.0076
AU526	11537	A	T	132	1	0.0076
AU526	1354	C	T	534	4	0.0075
AU526	1392	G	A	400	3	0.0075
AU526	6921	A	G	670	5	0.0075
AU526	7960	A	G	267	2	0.0075
AU526	8901	A	G	666	5	0.0075
AU526	9635	A	G	536	4	0.0075
AU526	9671	G	T	670	5	0.0075
AU526	11037	A	T	1476	11	0.0075
AU526	228	G	A	406	3	0.0074
AU526	1962	G	A	272	2	0.0074
AU526	2031	G	T	538	4	0.0074
AU526	2847	C	A	1358	10	0.0074
AU526	2927	T	C	944	7	0.0074
AU526	2929	C	T	947	7	0.0074
AU526	3118	G	A	407	3	0.0074
AU526	5607	A	G	537	4	0.0074
AU526	5919	C	T	541	4	0.0074
AU526	6571	G	A	405	3	0.0074
AU526	6633	T	C	405	3	0.0074
AU526	7256	A	T	272	2	0.0074
AU526	7288	T	C	272	2	0.0074
AU526	7903	A	G	270	2	0.0074
AU526	7965	A	G	271	2	0.0074
AU526	8493	T	C	408	3	0.0074
AU526	9375	T	C	941	7	0.0074
AU526	9630	C	T	540	4	0.0074
AU526	10061	A	G	1344	10	0.0074
AU526	10206	C	A	2566	19	0.0074
AU526	10538	A	T	272	2	0.0074
AU526	10743	A	G	403	3	0.0074
AU526	11055	G	T	1209	9	0.0074
AU526	11327	A	G	269	2	0.0074
AU526	348	A	G	683	5	0.0073
AU526	380	A	G	689	5	0.0073
AU526	1897	G	A	275	2	0.0073
AU526	1919	G	T	274	2	0.0073
AU526	3141	G	A	410	3	0.0073
AU526	3565	C	T	413	3	0.0073
AU526	4017	T	C	550	4	0.0073
AU526	4214	C	T	549	4	0.0073
AU526	5504	G	A	2044	15	0.0073
AU526	5622	A	G	412	3	0.0073
AU526	5623	G	A	411	3	0.0073
AU526	5897	G	T	412	3	0.0073
AU526	6702	T	A	547	4	0.0073
AU526	7954	T	C	275	2	0.0073
AU526	10044	C	T	1231	9	0.0073
AU526	11232	G	A	689	5	0.0073
AU526	11296	C	G	273	2	0.0073
AU526	123	G	A	276	2	0.0072
AU526	549	G	A	1526	11	0.0072
AU526	1266	A	G	836	6	0.0072
AU526	1439	T	A	415	3	0.0072
AU526	1442	T	C	417	3	0.0072
AU526	1563	T	C	833	6	0.0072
AU526	1914	G	A	279	2	0.0072
AU526	1915	G	T	277	2	0.0072
AU526	2193	G	A	838	6	0.0072
AU526	2565	A	T	968	7	0.0072
AU526	3157	C	T	419	3	0.0072
AU526	3187	G	T	555	4	0.0072
AU526	3197	G	T	553	4	0.0072
AU526	3470	T	C	276	2	0.0072
AU526	3494	G	A	278	2	0.0072
AU526	3660	T	C	698	5	0.0072
AU526	4011	T	C	555	4	0.0072
AU526	5213	G	T	3062	22	0.0072
AU526	6732	G	A	557	4	0.0072
AU526	7286	A	G	277	2	0.0072
AU526	7677	T	A	417	3	0.0072
AU526	7910	A	G	276	2	0.0072
AU526	7917	T	C	276	2	0.0072
AU526	8769	A	G	553	4	0.0072
AU526	9753	C	T	979	7	0.0072
AU526	10464	G	T	419	3	0.0072
AU526	10496	C	T	279	2	0.0072
AU526	10532	A	G	276	2	0.0072
AU526	11523	A	C	138	1	0.0072
AU526	115	A	G	280	2	0.0071
AU526	1128	A	G	984	7	0.0071
AU526	1443	A	T	420	3	0.0071
AU526	1456	G	T	425	3	0.0071
AU526	2952	G	T	700	5	0.0071
AU526	3548	C	T	421	3	0.0071
AU526	4516	C	T	561	4	0.0071
AU526	5545	G	A	986	7	0.0071
AU526	5644	A	G	280	2	0.0071
AU526	5649	C	T	283	2	0.0071
AU526	5685	A	T	283	2	0.0071
AU526	7089	A	G	283	2	0.0071
AU526	7227	C	T	283	2	0.0071
AU526	7310	C	T	281	2	0.0071
AU526	7814	C	T	283	2	0.0071
AU526	7975	A	G	280	2	0.0071
AU526	8486	A	G	420	3	0.0071
AU526	8555	A	G	560	4	0.0071
AU526	8730	A	T	567	4	0.0071
AU526	8947	C	T	840	6	0.0071
AU526	9201	T	G	563	4	0.0071
AU526	9311	T	C	980	7	0.0071
AU526	9420	C	T	845	6	0.0071
AU526	9713	T	C	841	6	0.0071
AU526	10540	T	C	282	2	0.0071
AU526	10747	G	A	420	3	0.0071
AU526	10750	A	T	421	3	0.0071
AU526	11115	G	A	991	7	0.0071
AU526	11257	A	G	563	4	0.0071
AU526	124	C	T	284	2	0.007
AU526	997	A	G	716	5	0.007
AU526	1593	T	C	862	6	0.007
AU526	1875	G	A	284	2	0.007
AU526	1879	C	T	285	2	0.007
AU526	2181	T	G	852	6	0.007
AU526	2553	C	T	858	6	0.007
AU526	3048	C	A	285	2	0.007
AU526	3153	G	T	428	3	0.007
AU526	3984	C	T	429	3	0.007
AU526	4278	G	A	573	4	0.007
AU526	4394	G	A	572	4	0.007
AU526	4488	G	A	574	4	0.007
AU526	5646	C	A	287	2	0.007
AU526	5959	A	G	861	6	0.007
AU526	6791	A	G	719	5	0.007
AU526	6793	G	T	716	5	0.007
AU526	7081	T	C	285	2	0.007
AU526	7660	G	T	428	3	0.007
AU526	7956	T	C	284	2	0.007
AU526	8571	C	T	574	4	0.007
AU526	10348	G	A	4713	33	0.007
AU526	10434	C	T	2138	15	0.007
AU526	10562	T	C	287	2	0.007
AU526	11294	A	G	287	2	0.007
AU526	1174	C	T	865	6	0.0069
AU526	2792	A	G	1749	12	0.0069
AU526	3406	G	T	290	2	0.0069
AU526	3840	G	A	291	2	0.0069
AU526	4131	G	T	721	5	0.0069
AU526	4366	A	G	577	4	0.0069
AU526	4401	A	G	577	4	0.0069
AU526	4496	A	C	578	4	0.0069
AU526	4815	T	C	727	5	0.0069
AU526	5740	T	C	288	2	0.0069
AU526	5932	G	A	581	4	0.0069
AU526	6301	C	T	434	3	0.0069
AU526	7326	G	T	290	2	0.0069
AU526	7412	G	A	436	3	0.0069
AU526	7415	G	A	436	3	0.0069
AU526	7644	T	C	437	3	0.0069
AU526	8079	T	C	291	2	0.0069
AU526	8558	A	G	579	4	0.0069
AU526	9511	G	A	578	4	0.0069
AU526	10099	C	T	1593	11	0.0069
AU526	10172	T	A	2310	16	0.0069
AU526	10457	A	C	577	4	0.0069
AU526	10559	C	T	288	2	0.0069
AU526	10767	A	G	436	3	0.0069
AU526	12	C	T	146	1	0.0068
AU526	238	G	A	443	3	0.0068
AU526	243	T	C	439	3	0.0068
AU526	1029	C	T	881	6	0.0068
AU526	1249	G	T	881	6	0.0068
AU526	1923	A	G	292	2	0.0068
AU526	1970	G	T	295	2	0.0068
AU526	2449	G	A	296	2	0.0068
AU526	2525	C	T	740	5	0.0068
AU526	3910	T	C	294	2	0.0068
AU526	4022	G	A	591	4	0.0068
AU526	4377	G	A	590	4	0.0068
AU526	4510	G	T	585	4	0.0068
AU526	4518	C	T	591	4	0.0068
AU526	4937	C	T	877	6	0.0068
AU526	4980	C	A	886	6	0.0068
AU526	5027	T	C	1171	8	0.0068
AU526	5745	T	C	294	2	0.0068
AU526	5763	T	C	293	2	0.0068
AU526	5788	T	C	294	2	0.0068
AU526	7095	G	A	295	2	0.0068
AU526	7806	C	T	292	2	0.0068
AU526	9181	G	C	444	3	0.0068
AU526	10500	A	T	295	2	0.0068
AU526	10512	C	T	295	2	0.0068
AU526	10924	G	T	1037	7	0.0068
AU526	11249	C	T	585	4	0.0068
AU526	11295	C	T	293	2	0.0068
AU526	11450	T	C	147	1	0.0068
AU526	10	A	G	149	1	0.0067
AU526	13	A	G	150	1	0.0067
AU526	2891	A	G	1192	8	0.0067
AU526	3397	A	G	298	2	0.0067
AU526	3857	T	C	297	2	0.0067
AU526	3875	C	T	298	2	0.0067
AU526	4376	G	A	596	4	0.0067
AU526	4389	C	A	597	4	0.0067
AU526	4446	A	G	597	4	0.0067
AU526	4945	C	A	899	6	0.0067
AU526	6937	G	T	593	4	0.0067
AU526	7059	C	A	298	2	0.0067
AU526	7272	T	C	298	2	0.0067
AU526	7328	G	A	299	2	0.0067
AU526	8074	A	G	299	2	0.0067
AU526	8499	C	T	450	3	0.0067
AU526	8802	G	A	746	5	0.0067
AU526	9294	G	A	890	6	0.0067
AU526	10869	T	C	594	4	0.0067
AU526	11211	T	C	747	5	0.0067
AU526	738	A	G	3640	24	0.0066
AU526	3606	A	G	602	4	0.0066
AU526	3612	G	T	603	4	0.0066
AU526	3999	T	A	454	3	0.0066
AU526	4123	A	T	755	5	0.0066
AU526	4231	G	T	602	4	0.0066
AU526	4506	A	G	603	4	0.0066
AU526	4542	G	T	607	4	0.0066
AU526	5498	T	C	2429	16	0.0066
AU526	5571	A	G	763	5	0.0066
AU526	5601	A	G	609	4	0.0066
AU526	5698	G	T	304	2	0.0066
AU526	5724	C	A	302	2	0.0066
AU526	5749	C	T	303	2	0.0066
AU526	6216	A	G	1355	9	0.0066
AU526	6294	A	G	455	3	0.0066
AU526	7284	A	G	302	2	0.0066
AU526	7329	A	G	304	2	0.0066
AU526	8026	T	A	304	2	0.0066
AU526	8028	T	C	304	2	0.0066
AU526	8035	A	T	305	2	0.0066
AU526	10577	A	G	303	2	0.0066
AU526	10654	T	C	303	2	0.0066
AU526	10722	G	A	454	3	0.0066
AU526	11466	C	T	152	1	0.0066
AU526	669	A	G	3673	24	0.0065
AU526	1575	T	C	921	6	0.0065
AU526	2493	C	T	459	3	0.0065
AU526	2691	C	T	1843	12	0.0065
AU526	2820	T	C	1541	10	0.0065
AU526	3926	T	G	308	2	0.0065
AU526	4176	C	T	617	4	0.0065
AU526	5731	G	A	306	2	0.0065
AU526	5752	G	T	308	2	0.0065
AU526	5779	C	T	306	2	0.0065
AU526	5802	G	T	307	2	0.0065
AU526	6198	G	T	1683	11	0.0065
AU526	6293	G	T	465	3	0.0065
AU526	6927	A	G	613	4	0.0065
AU526	7340	T	C	309	2	0.0065
AU526	7718	T	G	307	2	0.0065
AU526	8003	C	T	309	2	0.0065
AU526	8043	G	T	310	2	0.0065
AU526	8061	T	C	309	2	0.0065
AU526	8745	A	T	612	4	0.0065
AU526	8746	A	G	617	4	0.0065
AU526	8820	C	T	774	5	0.0065
AU526	9021	A	G	775	5	0.0065
AU526	9904	G	T	1680	11	0.0065
AU526	10060	A	G	1389	9	0.0065
AU526	10575	T	C	308	2	0.0065
AU526	11145	G	A	920	6	0.0065
AU526	11456	A	C	155	1	0.0065
AU526	11459	A	C	154	1	0.0065
AU526	11467	A	T	155	1	0.0065
AU526	11476	G	A	155	1	0.0065
AU526	38	A	G	156	1	0.0064
AU526	536	A	G	1406	9	0.0064
AU526	629	C	T	2989	19	0.0064
AU526	2381	G	A	470	3	0.0064
AU526	2982	A	G	472	3	0.0064
AU526	3730	G	A	626	4	0.0064
AU526	3850	C	A	313	2	0.0064
AU526	3884	T	C	313	2	0.0064
AU526	4083	C	T	776	5	0.0064
AU526	4113	T	C	781	5	0.0064
AU526	4806	A	G	629	4	0.0064
AU526	4809	C	T	627	4	0.0064
AU526	5659	G	T	311	2	0.0064
AU526	5808	T	G	311	2	0.0064
AU526	6291	T	C	466	3	0.0064
AU526	6555	A	G	471	3	0.0064
AU526	7076	T	C	312	2	0.0064
AU526	7770	C	G	312	2	0.0064
AU526	8031	A	G	312	2	0.0064
AU526	9643	A	G	472	3	0.0064
AU526	9846	G	A	1730	11	0.0064
AU526	10600	A	G	313	2	0.0064
AU526	11519	A	G	156	1	0.0064
AU526	24	T	C	159	1	0.0063
AU526	672	A	G	3670	23	0.0063
AU526	1002	A	T	794	5	0.0063
AU526	1927	A	G	320	2	0.0063
AU526	2085	C	T	793	5	0.0063
AU526	2499	A	C	477	3	0.0063
AU526	3003	G	A	320	2	0.0063
AU526	3078	C	T	319	2	0.0063
AU526	3576	T	C	474	3	0.0063
AU526	3847	G	A	317	2	0.0063
AU526	3852	T	C	317	2	0.0063
AU526	3869	T	C	320	2	0.0063
AU526	3919	G	T	315	2	0.0063
AU526	4529	T	C	638	4	0.0063
AU526	4530	C	A	632	4	0.0063
AU526	4539	G	A	634	4	0.0063
AU526	5481	A	G	3187	20	0.0063
AU526	5637	A	T	319	2	0.0063
AU526	5714	C	A	319	2	0.0063
AU526	5943	C	T	637	4	0.0063
AU526	7075	G	A	315	2	0.0063
AU526	7542	A	G	476	3	0.0063
AU526	7570	G	T	478	3	0.0063
AU526	7782	A	G	318	2	0.0063
AU526	8010	A	G	316	2	0.0063
AU526	9523	T	C	634	4	0.0063
AU526	9747	A	G	946	6	0.0063
AU526	9780	A	G	1109	7	0.0063
AU526	10486	G	T	320	2	0.0063
AU526	10488	A	G	316	2	0.0063
AU526	10657	C	T	320	2	0.0063
AU526	10668	C	T	315	2	0.0063
AU526	10827	G	A	474	3	0.0063
AU526	10853	G	T	473	3	0.0063
AU526	11156	C	T	946	6	0.0063
AU526	11196	C	T	799	5	0.0063
AU526	11501	G	T	158	1	0.0063
AU526	463	G	T	644	4	0.0062
AU526	2682	C	T	1764	11	0.0062
AU526	2784	A	G	1764	11	0.0062
AU526	3577	G	A	484	3	0.0062
AU526	3825	C	T	323	2	0.0062
AU526	3939	G	T	321	2	0.0062
AU526	5309	T	C	5019	31	0.0062
AU526	5352	T	C	6116	38	0.0062
AU526	5824	C	A	325	2	0.0062
AU526	6360	C	T	641	4	0.0062
AU526	6538	G	T	482	3	0.0062
AU526	7449	A	G	484	3	0.0062
AU526	7450	A	G	484	3	0.0062
AU526	7800	C	T	321	2	0.0062
AU526	8479	G	A	487	3	0.0062
AU526	9172	A	T	484	3	0.0062
AU526	9213	T	C	642	4	0.0062
AU526	9384	T	A	961	6	0.0062
AU526	9641	A	G	484	3	0.0062
AU526	9651	A	G	486	3	0.0062
AU526	10484	A	G	321	2	0.0062
AU526	10584	G	A	324	2	0.0062
AU526	10599	T	G	324	2	0.0062
AU526	10665	C	A	324	2	0.0062
AU526	10863	G	C	484	3	0.0062
AU526	11106	A	G	1129	7	0.0062
AU526	11499	T	C	162	1	0.0062
AU526	25	T	C	164	1	0.0061
AU526	31	A	T	164	1	0.0061
AU526	36	A	G	163	1	0.0061
AU526	1113	T	A	985	6	0.0061
AU526	1558	G	A	818	5	0.0061
AU526	1982	C	T	329	2	0.0061
AU526	3084	C	T	329	2	0.0061
AU526	3514	C	A	326	2	0.0061
AU526	3708	T	C	651	4	0.0061
AU526	3756	A	G	494	3	0.0061
AU526	3809	A	G	326	2	0.0061
AU526	3896	T	C	330	2	0.0061
AU526	3900	C	T	328	2	0.0061
AU526	5062	A	G	1308	8	0.0061
AU526	7000	A	G	490	3	0.0061
AU526	7005	A	G	488	3	0.0061
AU526	7345	C	T	328	2	0.0061
AU526	7527	T	C	490	3	0.0061
AU526	7783	G	T	327	2	0.0061
AU526	7985	C	T	328	2	0.0061
AU526	9192	A	G	492	3	0.0061
AU526	9195	G	A	494	3	0.0061
AU526	9303	C	T	982	6	0.0061
AU526	9334	T	C	986	6	0.0061
AU526	10020	T	C	1313	8	0.0061
AU526	10368	C	T	4241	26	0.0061
AU526	10603	C	A	327	2	0.0061
AU526	10624	G	T	330	2	0.0061
AU526	10636	T	C	328	2	0.0061
AU526	10645	A	G	328	2	0.0061
AU526	10677	C	T	330	2	0.0061
AU526	10891	C	T	824	5	0.0061
AU526	1368	G	A	497	3	0.006
AU526	1689	A	G	667	4	0.006
AU526	1812	A	G	335	2	0.006
AU526	1814	C	A	332	2	0.006
AU526	2130	T	C	838	5	0.006
AU526	2418	A	T	336	2	0.006
AU526	2466	C	G	332	2	0.006
AU526	2718	A	G	1991	12	0.006
AU526	2728	C	T	1996	12	0.006
AU526	2854	G	A	1323	8	0.006
AU526	3183	A	G	496	3	0.006
AU526	3390	T	C	335	2	0.006
AU526	3935	T	C	335	2	0.006
AU526	3946	A	G	332	2	0.006
AU526	4065	T	G	672	4	0.006
AU526	4619	A	G	500	3	0.006
AU526	4759	A	G	497	3	0.006
AU526	5388	G	A	5826	35	0.006
AU526	5632	G	C	335	2	0.006
AU526	7515	C	T	501	3	0.006
AU526	7518	C	T	502	3	0.006
AU526	7987	T	C	335	2	0.006
AU526	8200	C	T	671	4	0.006
AU526	9214	A	G	663	4	0.006
AU526	9267	A	G	830	5	0.006
AU526	9483	A	G	667	4	0.006
AU526	10479	G	T	334	2	0.006
AU526	10617	T	C	332	2	0.006
AU526	10621	G	A	334	2	0.006
AU526	10622	G	T	334	2	0.006
AU526	10642	T	G	335	2	0.006
AU526	10647	G	A	333	2	0.006
AU526	10674	C	A	335	2	0.006
AU526	10697	T	C	332	2	0.006
AU526	10911	A	G	993	6	0.006
AU526	1402	G	A	338	2	0.0059
AU526	1787	T	G	339	2	0.0059
AU526	2334	A	G	676	4	0.0059
AU526	2337	A	G	682	4	0.0059
AU526	2400	C	T	341	2	0.0059
AU526	2504	C	G	512	3	0.0059
AU526	3085	C	T	339	2	0.0059
AU526	3679	G	T	679	4	0.0059
AU526	3806	G	T	339	2	0.0059
AU526	3943	G	A	337	2	0.0059
AU526	6048	T	C	1852	11	0.0059
AU526	7988	T	C	340	2	0.0059
AU526	8017	G	T	338	2	0.0059
AU526	8121	C	A	341	2	0.0059
AU526	8895	A	T	673	4	0.0059
AU526	9163	A	C	512	3	0.0059
AU526	9397	T	C	1022	6	0.0059
AU526	10095	T	C	1514	9	0.0059
AU526	10583	G	T	339	2	0.0059
AU526	10610	T	C	338	2	0.0059
AU526	10683	T	C	337	2	0.0059
AU526	10695	G	A	341	2	0.0059
AU526	11276	C	T	506	3	0.0059
AU526	344	C	T	692	4	0.0058
AU526	851	A	G	2407	14	0.0058
AU526	1320	T	C	686	4	0.0058
AU526	1365	G	C	517	3	0.0058
AU526	1400	C	T	345	2	0.0058
AU526	2067	A	G	687	4	0.0058
AU526	2070	G	A	693	4	0.0058
AU526	2554	A	G	863	5	0.0058
AU526	3515	C	T	344	2	0.0058
AU526	3652	A	G	693	4	0.0058
AU526	3790	T	C	344	2	0.0058
AU526	3961	A	T	343	2	0.0058
AU526	4603	G	T	520	3	0.0058
AU526	4605	A	T	513	3	0.0058
AU526	5209	T	A	2236	13	0.0058
AU526	6189	G	A	1885	11	0.0058
AU526	6324	G	A	517	3	0.0058
AU526	6471	C	T	691	4	0.0058
AU526	7054	G	A	345	2	0.0058
AU526	7737	C	T	343	2	0.0058
AU526	7739	A	C	342	2	0.0058
AU526	9107	G	T	691	4	0.0058
AU526	9147	A	G	520	3	0.0058
AU526	9465	A	G	684	4	0.0058
AU526	10339	G	A	4500	26	0.0058
AU526	10354	T	C	4489	26	0.0058
AU526	10596	A	G	343	2	0.0058
AU526	10696	G	T	347	2	0.0058
AU526	11446	A	C	173	1	0.0058
AU526	6	G	A	176	1	0.0057
AU526	384	A	G	705	4	0.0057
AU526	392	T	C	699	4	0.0057
AU526	406	G	A	701	4	0.0057
AU526	528	G	T	1238	7	0.0057
AU526	559	C	A	1566	9	0.0057
AU526	747	A	G	3833	22	0.0057
AU526	995	A	G	705	4	0.0057
AU526	1061	G	T	1060	6	0.0057
AU526	1428	G	A	350	2	0.0057
AU526	1775	A	G	353	2	0.0057
AU526	2034	G	T	527	3	0.0057
AU526	2643	T	C	1392	8	0.0057
AU526	2709	A	G	1928	11	0.0057
AU526	3096	C	T	353	2	0.0057
AU526	3100	G	T	353	2	0.0057
AU526	3174	C	T	523	3	0.0057
AU526	3388	G	A	350	2	0.0057
AU526	3744	A	G	529	3	0.0057
AU526	3746	A	G	525	3	0.0057
AU526	3769	C	T	527	3	0.0057
AU526	3970	C	T	351	2	0.0057
AU526	3972	G	A	352	2	0.0057
AU526	5501	G	A	2289	13	0.0057
AU526	6379	T	C	698	4	0.0057
AU526	7456	A	G	523	3	0.0057
AU526	8124	G	C	350	2	0.0057
AU526	8691	A	G	699	4	0.0057
AU526	8764	T	C	530	3	0.0057
AU526	9580	A	G	529	3	0.0057
AU526	9948	C	T	1392	8	0.0057
AU526	10347	T	C	4711	27	0.0057
AU526	11069	G	T	1237	7	0.0057
AU526	11445	A	C	176	1	0.0057
AU526	361	G	T	714	4	0.0056
AU526	495	T	C	889	5	0.0056
AU526	1648	C	T	710	4	0.0056
AU526	1984	A	C	357	2	0.0056
AU526	2427	T	C	354	2	0.0056
AU526	2907	T	C	1062	6	0.0056
AU526	3181	G	T	538	3	0.0056
AU526	3795	T	C	355	2	0.0056
AU526	3801	T	C	360	2	0.0056
AU526	3965	G	A	358	2	0.0056
AU526	3976	G	A	354	2	0.0056
AU526	3978	G	A	355	2	0.0056
AU526	4003	G	A	534	3	0.0056
AU526	4220	T	C	540	3	0.0056
AU526	4233	G	A	537	3	0.0056
AU526	5866	G	T	354	2	0.0056
AU526	5888	T	C	358	2	0.0056
AU526	5946	T	C	719	4	0.0056
AU526	6855	G	A	886	5	0.0056
AU526	6958	G	T	533	3	0.0056
AU526	7777	A	G	356	2	0.0056
AU526	8266	C	T	900	5	0.0056
AU526	8421	T	A	711	4	0.0056
AU526	8695	G	T	712	4	0.0056
AU526	8884	A	G	709	4	0.0056
AU526	9080	T	C	720	4	0.0056
AU526	10401	A	G	3202	18	0.0056
AU526	10692	G	A	358	2	0.0056
AU526	11079	G	A	1249	7	0.0056
AU526	529	G	T	1279	7	0.0055
AU526	1380	A	G	542	3	0.0055
AU526	1421	T	C	364	2	0.0055
AU526	2079	C	A	728	4	0.0055
AU526	2175	C	T	910	5	0.0055
AU526	2407	T	C	362	2	0.0055
AU526	2507	A	C	549	3	0.0055
AU526	2628	T	C	1279	7	0.0055
AU526	3106	C	A	363	2	0.0055
AU526	3108	G	C	365	2	0.0055
AU526	3594	C	A	550	3	0.0055
AU526	3675	A	G	723	4	0.0055
AU526	4597	A	G	544	3	0.0055
AU526	4986	C	T	916	5	0.0055
AU526	5840	C	T	364	2	0.0055
AU526	5880	C	T	366	2	0.0055
AU526	5883	T	C	366	2	0.0055
AU526	6032	G	A	1278	7	0.0055
AU526	6249	T	C	912	5	0.0055
AU526	6463	C	T	733	4	0.0055
AU526	6942	A	T	550	3	0.0055
AU526	6974	G	T	549	3	0.0055
AU526	7581	T	C	541	3	0.0055
AU526	7691	C	A	361	2	0.0055
AU526	8274	A	G	901	5	0.0055
AU526	8443	G	T	729	4	0.0055
AU526	8559	G	T	542	3	0.0055
AU526	8592	T	C	727	4	0.0055
AU526	8784	G	A	726	4	0.0055
AU526	9373	T	C	912	5	0.0055
AU526	9556	G	A	542	3	0.0055
AU526	9690	T	C	723	4	0.0055
AU526	10935	G	A	1082	6	0.0055
AU526	285	A	G	560	3	0.0054
AU526	1289	C	T	743	4	0.0054
AU526	1394	A	G	371	2	0.0054
AU526	1799	T	C	371	2	0.0054
AU526	2723	A	G	2040	11	0.0054
AU526	3250	G	T	736	4	0.0054
AU526	3799	A	T	372	2	0.0054
AU526	4082	T	C	744	4	0.0054
AU526	4086	G	A	745	4	0.0054
AU526	4129	T	C	735	4	0.0054
AU526	4130	G	A	747	4	0.0054
AU526	4297	T	G	553	3	0.0054
AU526	4845	C	G	740	4	0.0054
AU526	5559	T	C	927	5	0.0054
AU526	5839	A	G	367	2	0.0054
AU526	6381	C	T	741	4	0.0054
AU526	6395	G	A	735	4	0.0054
AU526	6711	T	C	557	3	0.0054
AU526	8189	C	G	553	3	0.0054
AU526	8779	A	G	746	4	0.0054
AU526	9026	G	A	745	4	0.0054
AU526	9077	T	C	746	4	0.0054
AU526	9079	C	A	734	4	0.0054
AU526	9100	T	G	745	4	0.0054
AU526	9200	C	G	553	3	0.0054
AU526	9825	T	C	1653	9	0.0054
AU526	9956	G	A	1304	7	0.0054
AU526	10701	C	A	368	2	0.0054
AU526	10905	G	T	930	5	0.0054
AU526	11266	A	G	560	3	0.0054
AU526	472	A	G	757	4	0.0053
AU526	1301	T	C	754	4	0.0053
AU526	1413	A	C	375	2	0.0053
AU526	1532	T	C	756	4	0.0053
AU526	2058	T	C	755	4	0.0053
AU526	2156	C	T	942	5	0.0053
AU526	2237	G	A	940	5	0.0053
AU526	2880	A	G	1142	6	0.0053
AU526	3000	C	A	375	2	0.0053
AU526	3191	C	T	562	3	0.0053
AU526	3345	A	G	561	3	0.0053
AU526	3522	C	A	378	2	0.0053
AU526	5134	G	T	1332	7	0.0053
AU526	5627	A	G	376	2	0.0053
AU526	5628	C	T	375	2	0.0053
AU526	6700	A	G	564	3	0.0053
AU526	6745	T	A	570	3	0.0053
AU526	6796	C	T	759	4	0.0053
AU526	6798	G	A	753	4	0.0053
AU526	7713	G	T	377	2	0.0053
AU526	8426	C	G	755	4	0.0053
AU526	8602	A	G	760	4	0.0053
AU526	8781	T	G	761	4	0.0053
AU526	8815	G	C	756	4	0.0053
AU526	9049	T	C	761	4	0.0053
AU526	9074	T	C	756	4	0.0053
AU526	9231	A	T	760	4	0.0053
AU526	11226	T	C	758	4	0.0053
AU526	11430	T	G	187	1	0.0053
AU526	147	C	T	382	2	0.0052
AU526	800	T	C	2910	15	0.0052
AU526	895	C	T	1910	10	0.0052
AU526	1298	A	G	763	4	0.0052
AU526	1698	T	C	573	3	0.0052
AU526	1708	G	A	581	3	0.0052
AU526	2389	C	A	384	2	0.0052
AU526	2970	C	T	578	3	0.0052
AU526	3245	C	T	776	4	0.0052
AU526	3379	T	C	388	2	0.0052
AU526	3523	A	T	388	2	0.0052
AU526	4075	A	G	764	4	0.0052
AU526	4121	G	A	767	4	0.0052
AU526	4143	T	C	767	4	0.0052
AU526	4245	C	T	579	3	0.0052
AU526	4568	A	G	577	3	0.0052
AU526	4581	T	C	576	3	0.0052
AU526	4782	C	T	577	3	0.0052
AU526	5164	G	T	1540	8	0.0052
AU526	5421	G	A	4643	24	0.0052
AU526	6821	C	T	774	4	0.0052
AU526	6876	G	A	772	4	0.0052
AU526	7353	T	C	385	2	0.0052
AU526	8822	A	T	769	4	0.0052
AU526	8831	T	A	776	4	0.0052
AU526	8891	T	C	763	4	0.0052
AU526	8974	G	A	969	5	0.0052
AU526	8994	A	G	957	5	0.0052
AU526	9022	G	T	772	4	0.0052
AU526	9313	A	G	957	5	0.0052
AU526	10093	G	A	1537	8	0.0052
AU526	10716	T	C	388	2	0.0052
AU526	10996	G	A	1350	7	0.0052
AU526	11131	T	A	967	5	0.0052
AU526	412	T	G	592	3	0.0051
AU526	1494	C	T	587	3	0.0051
AU526	2490	A	T	391	2	0.0051
AU526	2727	T	C	1949	10	0.0051
AU526	3113	T	C	391	2	0.0051
AU526	3372	G	T	389	2	0.0051
AU526	3531	T	C	395	2	0.0051
AU526	4195	G	A	589	3	0.0051
AU526	4202	T	G	594	3	0.0051
AU526	4381	G	T	593	3	0.0051
AU526	4472	A	G	591	3	0.0051
AU526	4493	G	T	583	3	0.0051
AU526	4509	C	T	584	3	0.0051
AU526	5280	C	T	4551	23	0.0051
AU526	5283	C	T	4704	24	0.0051
AU526	5624	G	T	396	2	0.0051
AU526	5993	A	G	1177	6	0.0051
AU526	6171	C	T	2173	11	0.0051
AU526	6563	T	C	394	2	0.0051
AU526	6607	T	C	394	2	0.0051
AU526	6635	C	T	392	2	0.0051
AU526	6762	A	G	594	3	0.0051
AU526	6901	A	G	788	4	0.0051
AU526	6913	A	G	781	4	0.0051
AU526	7700	T	C	391	2	0.0051
AU526	8320	G	T	974	5	0.0051
AU526	8360	A	G	975	5	0.0051
AU526	8742	A	C	590	3	0.0051
AU526	9510	G	C	590	3	0.0051
AU526	9516	G	A	588	3	0.0051
AU526	9534	A	G	587	3	0.0051
AU526	9564	T	C	584	3	0.0051
AU526	9567	A	G	583	3	0.0051
AU526	9659	A	C	589	3	0.0051
AU526	9803	G	T	1374	7	0.0051
AU526	9996	A	G	1183	6	0.0051
AU526	410	G	A	599	3	0.005
AU526	447	A	G	604	3	0.005
AU526	900	T	C	1815	9	0.005
AU526	947	C	T	1202	6	0.005
AU526	956	C	T	1192	6	0.005
AU526	976	G	A	807	4	0.005
AU526	1273	T	C	793	4	0.005
AU526	1451	A	C	404	2	0.005
AU526	1768	G	T	404	2	0.005
AU526	2509	A	C	604	3	0.005
AU526	2584	A	G	996	5	0.005
AU526	2649	G	A	1412	7	0.005
AU526	3122	T	A	403	2	0.005
AU526	3543	A	G	400	2	0.005
AU526	4160	T	C	602	3	0.005
AU526	4290	A	G	605	3	0.005
AU526	4318	T	C	603	3	0.005
AU526	4383	A	G	605	3	0.005
AU526	4521	G	A	597	3	0.005
AU526	4862	G	A	802	4	0.005
AU526	5900	A	T	397	2	0.005
AU526	6566	A	G	404	2	0.005
AU526	6597	C	T	398	2	0.005
AU526	7371	G	T	398	2	0.005
AU526	7705	G	T	401	2	0.005
AU526	8440	T	C	795	4	0.005
AU526	8754	G	A	597	3	0.005
AU526	8925	A	G	800	4	0.005
AU526	10471	G	T	399	2	0.005
AU526	10740	A	G	402	2	0.005
AU526	10755	C	G	397	2	0.005
AU526	11250	G	A	600	3	0.005
AU526	11254	A	G	596	3	0.005
AU526	11407	T	C	200	1	0.005
AU526	11409	C	T	200	1	0.005
AU526	11410	A	G	200	1	0.005
AU526	150	A	G	406	2	0.0049
AU526	507	C	A	1012	5	0.0049
AU526	933	T	C	1417	7	0.0049
AU526	1991	C	T	407	2	0.0049
AU526	2000	T	C	410	2	0.0049
AU526	2040	T	C	617	3	0.0049
AU526	2292	A	G	823	4	0.0049
AU526	2388	C	T	410	2	0.0049
AU526	2871	A	G	1225	6	0.0049
AU526	2898	G	T	1030	5	0.0049
AU526	2960	G	A	610	3	0.0049
AU526	3133	G	T	409	2	0.0049
AU526	3150	T	C	412	2	0.0049
AU526	3716	A	G	618	3	0.0049
AU526	4317	G	T	610	3	0.0049
AU526	4320	G	A	613	3	0.0049
AU526	4325	A	G	618	3	0.0049
AU526	4413	T	C	614	3	0.0049
AU526	4465	G	A	609	3	0.0049
AU526	4577	G	A	611	3	0.0049
AU526	4861	G	T	819	4	0.0049
AU526	5261	T	C	3852	19	0.0049
AU526	5392	A	G	5526	27	0.0049
AU526	5936	T	A	609	3	0.0049
AU526	5940	G	A	614	3	0.0049
AU526	6024	A	G	1235	6	0.0049
AU526	6057	T	C	1823	9	0.0049
AU526	6119	C	T	2058	10	0.0049
AU526	6403	G	A	811	4	0.0049
AU526	6573	A	C	412	2	0.0049
AU526	6600	T	A	406	2	0.0049
AU526	6618	A	T	407	2	0.0049
AU526	6631	G	T	409	2	0.0049
AU526	6640	A	T	405	2	0.0049
AU526	7036	G	A	410	2	0.0049
AU526	8150	G	T	406	2	0.0049
AU526	8227	G	T	824	4	0.0049
AU526	8726	T	A	616	3	0.0049
AU526	9306	A	G	1014	5	0.0049
AU526	9759	A	G	1029	5	0.0049
AU526	9873	A	G	1635	8	0.0049
AU526	9960	T	C	1415	7	0.0049
AU526	10305	T	C	4921	24	0.0049
AU526	10738	G	T	406	2	0.0049
AU526	10741	C	T	407	2	0.0049
AU526	10749	T	C	409	2	0.0049
AU526	11172	G	A	814	4	0.0049
AU526	11433	C	T	206	1	0.0049
AU526	169	C	A	418	2	0.0048
AU526	173	C	T	413	2	0.0048
AU526	174	C	T	421	2	0.0048
AU526	201	T	A	413	2	0.0048
AU526	210	G	T	419	2	0.0048
AU526	211	T	A	415	2	0.0048
AU526	235	A	C	417	2	0.0048
AU526	310	G	T	624	3	0.0048
AU526	320	A	G	624	3	0.0048
AU526	414	C	T	626	3	0.0048
AU526	882	T	C	2090	10	0.0048
AU526	1017	C	T	837	4	0.0048
AU526	1201	A	G	826	4	0.0048
AU526	1389	T	C	413	2	0.0048
AU526	1390	A	G	418	2	0.0048
AU526	1564	T	C	838	4	0.0048
AU526	1567	C	T	829	4	0.0048
AU526	1996	T	A	419	2	0.0048
AU526	1998	G	A	414	2	0.0048
AU526	2387	G	A	421	2	0.0048
AU526	2510	A	C	621	3	0.0048
AU526	2859	C	T	1245	6	0.0048
AU526	2863	G	A	1247	6	0.0048
AU526	3143	A	G	414	2	0.0048
AU526	3987	C	T	414	2	0.0048
AU526	4299	T	C	629	3	0.0048
AU526	4346	T	C	622	3	0.0048
AU526	4650	T	A	420	2	0.0048
AU526	5139	T	C	1472	7	0.0048
AU526	6447	T	C	831	4	0.0048
AU526	6496	C	A	631	3	0.0048
AU526	6576	C	T	417	2	0.0048
AU526	6602	T	C	420	2	0.0048
AU526	6655	T	C	417	2	0.0048
AU526	6768	T	C	630	3	0.0048
AU526	7607	T	C	420	2	0.0048
AU526	7646	C	T	417	2	0.0048
AU526	7661	C	A	413	2	0.0048
AU526	7676	C	T	418	2	0.0048
AU526	7679	A	G	421	2	0.0048
AU526	8933	T	C	832	4	0.0048
AU526	8946	G	A	836	4	0.0048
AU526	9210	T	A	629	3	0.0048
AU526	9262	A	G	827	4	0.0048
AU526	9708	T	C	842	4	0.0048
AU526	10449	C	T	1458	7	0.0048
AU526	10732	A	G	419	2	0.0048
AU526	10746	G	A	421	2	0.0048
AU526	10748	G	A	420	2	0.0048
AU526	10759	C	T	414	2	0.0048
AU526	11235	T	C	625	3	0.0048
AU526	200	G	T	428	2	0.0047
AU526	215	G	T	425	2	0.0047
AU526	459	A	C	643	3	0.0047
AU526	827	G	A	2552	12	0.0047
AU526	1265	A	G	852	4	0.0047
AU526	1548	T	C	849	4	0.0047
AU526	1587	T	C	854	4	0.0047
AU526	1635	T	C	849	4	0.0047
AU526	1694	T	C	641	3	0.0047
AU526	2188	C	T	853	4	0.0047
AU526	2190	G	A	849	4	0.0047
AU526	2198	A	G	846	4	0.0047
AU526	2351	T	C	636	3	0.0047
AU526	2384	T	G	426	2	0.0047
AU526	3559	T	C	430	2	0.0047
AU526	3561	T	C	428	2	0.0047
AU526	4040	T	C	640	3	0.0047
AU526	4041	C	T	643	3	0.0047
AU526	4338	G	T	636	3	0.0047
AU526	4549	G	T	635	3	0.0047
AU526	5178	A	G	1491	7	0.0047
AU526	6050	A	G	1918	9	0.0047
AU526	6072	T	C	1902	9	0.0047
AU526	6427	A	G	843	4	0.0047
AU526	6864	A	T	852	4	0.0047
AU526	6924	T	C	643	3	0.0047
AU526	7655	G	A	424	2	0.0047
AU526	7670	T	A	424	2	0.0047
AU526	7680	G	T	425	2	0.0047
AU526	7699	A	C	422	2	0.0047
AU526	8153	A	G	422	2	0.0047
AU526	8241	A	G	849	4	0.0047
AU526	8513	A	T	428	2	0.0047
AU526	9224	T	G	637	3	0.0047
AU526	9273	G	A	856	4	0.0047
AU526	9504	A	G	643	3	0.0047
AU526	10342	G	A	4512	21	0.0047
AU526	10446	C	T	1718	8	0.0047
AU526	10893	G	A	847	4	0.0047
AU526	11062	A	G	1283	6	0.0047
AU526	11240	C	T	642	3	0.0047
AU526	11432	T	A	213	1	0.0047
AU526	186	T	C	435	2	0.0046
AU526	195	A	G	432	2	0.0046
AU526	237	T	C	439	2	0.0046
AU526	255	A	G	435	2	0.0046
AU526	260	C	T	439	2	0.0046
AU526	494	T	C	861	4	0.0046
AU526	781	G	T	3487	16	0.0046
AU526	856	A	G	2377	11	0.0046
AU526	914	A	G	1529	7	0.0046
AU526	965	A	G	1094	5	0.0046
AU526	1176	G	A	868	4	0.0046
AU526	1207	A	T	866	4	0.0046
AU526	1209	A	G	874	4	0.0046
AU526	1455	G	T	432	2	0.0046
AU526	1497	T	C	656	3	0.0046
AU526	1581	G	T	865	4	0.0046
AU526	1605	C	T	877	4	0.0046
AU526	2118	A	G	879	4	0.0046
AU526	2197	G	T	866	4	0.0046
AU526	2263	A	G	874	4	0.0046
AU526	2349	C	T	652	3	0.0046
AU526	4151	A	G	654	3	0.0046
AU526	4350	G	T	648	3	0.0046
AU526	4550	C	T	651	3	0.0046
AU526	4648	G	A	439	2	0.0046
AU526	4910	T	A	878	4	0.0046
AU526	4952	G	T	868	4	0.0046
AU526	4973	A	T	871	4	0.0046
AU526	5165	T	C	1518	7	0.0046
AU526	5904	T	C	433	2	0.0046
AU526	5963	G	T	864	4	0.0046
AU526	6185	G	T	1946	9	0.0046
AU526	6356	A	T	651	3	0.0046
AU526	6492	T	C	658	3	0.0046
AU526	7423	G	A	432	2	0.0046
AU526	7424	C	T	435	2	0.0046
AU526	7667	A	G	432	2	0.0046
AU526	7674	G	A	432	2	0.0046
AU526	8512	A	G	433	2	0.0046
AU526	9767	A	G	1093	5	0.0046
AU526	10203	A	G	2617	12	0.0046
AU526	10875	T	C	647	3	0.0046
AU526	10886	G	A	647	3	0.0046
AU526	10936	A	G	1087	5	0.0046
AU526	11074	T	C	1308	6	0.0046
AU526	81	A	T	224	1	0.0045
AU526	187	T	G	442	2	0.0045
AU526	196	A	G	441	2	0.0045
AU526	204	C	A	441	2	0.0045
AU526	679	G	A	3811	17	0.0045
AU526	1032	T	C	885	4	0.0045
AU526	1242	T	C	881	4	0.0045
AU526	1599	G	A	883	4	0.0045
AU526	1619	A	G	895	4	0.0045
AU526	2343	A	G	664	3	0.0045
AU526	2742	A	G	2015	9	0.0045
AU526	2993	A	G	441	2	0.0045
AU526	3014	A	G	223	1	0.0045
AU526	3015	C	A	221	1	0.0045
AU526	3016	T	C	221	1	0.0045
AU526	3572	T	C	444	2	0.0045
AU526	3636	C	T	669	3	0.0045
AU526	3711	A	G	663	3	0.0045
AU526	3996	T	C	447	2	0.0045
AU526	4632	G	T	446	2	0.0045
AU526	4972	C	A	883	4	0.0045
AU526	5259	T	C	3770	17	0.0045
AU526	5535	A	G	1327	6	0.0045
AU526	5618	A	G	447	2	0.0045
AU526	6036	C	T	1338	6	0.0045
AU526	6247	G	A	885	4	0.0045
AU526	6300	G	A	442	2	0.0045
AU526	6493	C	T	660	3	0.0045
AU526	6558	G	A	441	2	0.0045
AU526	6662	T	C	449	2	0.0045
AU526	7441	G	A	446	2	0.0045
AU526	7647	G	T	444	2	0.0045
AU526	7649	G	T	442	2	0.0045
AU526	7665	G	T	449	2	0.0045
AU526	8163	T	C	444	2	0.0045
AU526	8255	T	G	881	4	0.0045
AU526	8265	T	A	897	4	0.0045
AU526	8484	G	T	441	2	0.0045
AU526	8721	A	G	665	3	0.0045
AU526	9408	T	C	896	4	0.0045
AU526	10403	A	G	3112	14	0.0045
AU526	10977	T	C	1321	6	0.0045
AU526	11040	A	T	1323	6	0.0045
AU526	11046	C	T	1348	6	0.0045
AU526	11387	T	A	221	1	0.0045
AU526	11400	A	G	222	1	0.0045
AU526	80	A	G	227	1	0.0044
AU526	327	A	T	676	3	0.0044
AU526	355	G	T	676	3	0.0044
AU526	377	G	A	676	3	0.0044
AU526	525	G	A	1126	5	0.0044
AU526	535	A	G	1378	6	0.0044
AU526	787	G	T	3183	14	0.0044
AU526	1034	A	G	905	4	0.0044
AU526	1314	G	T	682	3	0.0044
AU526	1684	C	T	689	3	0.0044
AU526	2176	T	C	901	4	0.0044
AU526	2280	T	A	906	4	0.0044
AU526	2286	C	T	915	4	0.0044
AU526	2601	G	T	1127	5	0.0044
AU526	2622	C	T	1351	6	0.0044
AU526	2787	A	G	1823	8	0.0044
AU526	2893	C	T	1144	5	0.0044
AU526	3044	A	C	226	1	0.0044
AU526	3434	A	C	229	1	0.0044
AU526	3648	G	A	677	3	0.0044
AU526	3667	A	G	682	3	0.0044
AU526	3689	T	C	688	3	0.0044
AU526	4329	T	C	687	3	0.0044
AU526	4330	A	G	688	3	0.0044
AU526	4635	T	A	455	2	0.0044
AU526	4647	C	T	456	2	0.0044
AU526	4965	A	C	903	4	0.0044
AU526	5097	A	G	1374	6	0.0044
AU526	5286	C	T	4762	21	0.0044
AU526	5970	G	A	905	4	0.0044
AU526	5994	C	T	1145	5	0.0044
AU526	6246	G	C	910	4	0.0044
AU526	6306	T	C	450	2	0.0044
AU526	6477	G	T	687	3	0.0044
AU526	6667	G	T	450	2	0.0044
AU526	6671	G	A	459	2	0.0044
AU526	6861	A	G	916	4	0.0044
AU526	7015	G	T	452	2	0.0044
AU526	7019	A	G	456	2	0.0044
AU526	7026	C	A	452	2	0.0044
AU526	7164	T	C	228	1	0.0044
AU526	7407	A	G	450	2	0.0044
AU526	7567	A	G	455	2	0.0044
AU526	8172	G	T	457	2	0.0044
AU526	8524	G	T	457	2	0.0044
AU526	8529	T	C	450	2	0.0044
AU526	8533	T	C	457	2	0.0044
AU526	9083	G	A	678	3	0.0044
AU526	9344	A	G	917	4	0.0044
AU526	10062	G	T	1359	6	0.0044
AU526	10413	T	C	2718	12	0.0044
AU526	10730	T	G	454	2	0.0044
AU526	10783	A	G	459	2	0.0044
AU526	76	G	C	231	1	0.0043
AU526	249	A	G	460	2	0.0043
AU526	527	C	G	1167	5	0.0043
AU526	567	A	G	1841	8	0.0043
AU526	630	C	T	3039	13	0.0043
AU526	810	A	G	2786	12	0.0043
AU526	1103	A	G	937	4	0.0043
AU526	1251	A	G	927	4	0.0043
AU526	1321	T	A	693	3	0.0043
AU526	1470	G	T	470	2	0.0043
AU526	1620	T	A	922	4	0.0043
AU526	1671	T	C	694	3	0.0043
AU526	1758	T	C	461	2	0.0043
AU526	2015	T	A	467	2	0.0043
AU526	2231	A	T	936	4	0.0043
AU526	2872	G	T	1176	5	0.0043
AU526	2887	G	A	1150	5	0.0043
AU526	3013	A	C	234	1	0.0043
AU526	3446	T	C	234	1	0.0043
AU526	3448	A	G	231	1	0.0043
AU526	3574	G	T	466	2	0.0043
AU526	3776	A	C	468	2	0.0043
AU526	4669	A	G	463	2	0.0043
AU526	4728	A	G	468	2	0.0043
AU526	4813	G	A	702	3	0.0043
AU526	5154	G	T	1403	6	0.0043
AU526	5191	T	A	1874	8	0.0043
AU526	5503	C	A	2080	9	0.0043
AU526	5556	C	A	925	4	0.0043
AU526	5614	A	T	463	2	0.0043
AU526	5616	G	A	467	2	0.0043
AU526	5912	G	A	462	2	0.0043
AU526	6120	C	A	2095	9	0.0043
AU526	6489	C	T	692	3	0.0043
AU526	6546	T	C	468	2	0.0043
AU526	6548	A	G	470	2	0.0043
AU526	7149	C	A	231	1	0.0043
AU526	7167	T	A	234	1	0.0043
AU526	7208	G	A	232	1	0.0043
AU526	7236	T	C	231	1	0.0043
AU526	7241	C	T	231	1	0.0043
AU526	7431	A	G	470	2	0.0043
AU526	7551	C	T	463	2	0.0043
AU526	7631	A	T	468	2	0.0043
AU526	8259	T	C	921	4	0.0043
AU526	8270	C	T	932	4	0.0043
AU526	8517	A	G	470	2	0.0043
AU526	9133	T	C	698	3	0.0043
AU526	9168	T	A	469	2	0.0043
AU526	9183	G	T	468	2	0.0043
AU526	9184	C	T	465	2	0.0043
AU526	9493	A	G	698	3	0.0043
AU526	9687	C	A	704	3	0.0043
AU526	9737	A	G	921	4	0.0043
AU526	9972	G	A	1173	5	0.0043
AU526	10253	A	G	3499	15	0.0043
AU526	10726	T	A	461	2	0.0043
AU526	10780	A	G	461	2	0.0043
AU526	10860	A	G	469	2	0.0043
AU526	10862	G	T	467	2	0.0043
AU526	10884	T	C	693	3	0.0043
AU526	11097	C	T	1150	5	0.0043
AU526	11385	C	T	231	1	0.0043
AU526	87	T	A	238	1	0.0042
AU526	618	G	A	2841	12	0.0042
AU526	621	A	G	2842	12	0.0042
AU526	756	A	G	3586	15	0.0042
AU526	930	T	C	1436	6	0.0042
AU526	987	C	T	707	3	0.0042
AU526	1135	G	T	945	4	0.0042
AU526	1746	A	T	478	2	0.0042
AU526	1748	A	G	475	2	0.0042
AU526	2028	A	G	478	2	0.0042
AU526	2072	A	G	720	3	0.0042
AU526	2223	A	G	962	4	0.0042
AU526	2658	A	C	1442	6	0.0042
AU526	2826	G	A	1436	6	0.0042
AU526	2864	T	C	1200	5	0.0042
AU526	3028	T	G	237	1	0.0042
AU526	3163	A	G	478	2	0.0042
AU526	3432	A	C	239	1	0.0042
AU526	3661	G	T	709	3	0.0042
AU526	4074	T	C	711	3	0.0042
AU526	4834	A	G	717	3	0.0042
AU526	4968	A	G	945	4	0.0042
AU526	4969	G	A	949	4	0.0042
AU526	4988	A	G	944	4	0.0042
AU526	5034	C	T	1188	5	0.0042
AU526	5183	G	T	1663	7	0.0042
AU526	5909	G	T	474	2	0.0042
AU526	6102	G	T	2119	9	0.0042
AU526	6371	C	T	720	3	0.0042
AU526	6384	G	A	720	3	0.0042
AU526	6387	C	T	720	3	0.0042
AU526	6554	C	A	476	2	0.0042
AU526	6681	G	A	472	2	0.0042
AU526	6779	T	A	722	3	0.0042
AU526	7148	T	C	236	1	0.0042
AU526	7161	C	A	238	1	0.0042
AU526	7183	G	T	236	1	0.0042
AU526	7224	A	G	240	1	0.0042
AU526	7243	G	A	236	1	0.0042
AU526	7502	C	T	478	2	0.0042
AU526	7531	A	T	478	2	0.0042
AU526	8267	T	C	949	4	0.0042
AU526	8301	C	T	958	4	0.0042
AU526	8387	A	G	944	4	0.0042
AU526	8690	A	T	707	3	0.0042
AU526	8696	T	C	708	3	0.0042
AU526	8697	A	G	717	3	0.0042
AU526	9034	G	A	713	3	0.0042
AU526	9066	C	A	717	3	0.0042
AU526	9090	A	G	715	3	0.0042
AU526	9177	A	G	473	2	0.0042
AU526	9178	C	A	471	2	0.0042
AU526	9194	T	G	473	2	0.0042
AU526	9230	A	G	719	3	0.0042
AU526	9403	G	T	943	4	0.0042
AU526	9642	C	T	474	2	0.0042
AU526	9653	C	T	477	2	0.0042
AU526	9696	A	G	721	3	0.0042
AU526	9829	A	T	1653	7	0.0042
AU526	9858	A	G	1662	7	0.0042
AU526	9861	A	G	1672	7	0.0042
AU526	10826	C	T	481	2	0.0042
AU526	10889	T	G	719	3	0.0042
AU526	11157	T	A	961	4	0.0042
AU526	11366	T	A	238	1	0.0042
AU526	11383	A	G	238	1	0.0042
AU526	72	A	C	242	1	0.0041
AU526	543	A	G	1453	6	0.0041
AU526	849	G	A	2420	10	0.0041
AU526	983	T	C	731	3	0.0041
AU526	984	G	A	733	3	0.0041
AU526	1527	T	C	731	3	0.0041
AU526	1665	A	G	726	3	0.0041
AU526	1740	C	A	490	2	0.0041
AU526	2016	G	A	484	2	0.0041
AU526	2019	G	A	483	2	0.0041
AU526	2025	C	T	482	2	0.0041
AU526	2331	T	A	724	3	0.0041
AU526	2757	G	A	1952	8	0.0041
AU526	2805	C	T	1711	7	0.0041
AU526	3011	A	G	242	1	0.0041
AU526	3265	G	T	729	3	0.0041
AU526	3435	G	T	242	1	0.0041
AU526	3454	A	C	246	1	0.0041
AU526	3581	C	A	487	2	0.0041
AU526	3764	T	G	492	2	0.0041
AU526	4618	C	T	493	2	0.0041
AU526	4678	C	A	491	2	0.0041
AU526	4726	G	T	486	2	0.0041
AU526	4744	G	T	493	2	0.0041
AU526	4833	G	C	735	3	0.0041
AU526	5175	A	G	1464	6	0.0041
AU526	5538	A	C	1221	5	0.0041
AU526	5544	A	C	977	4	0.0041
AU526	5908	G	A	488	2	0.0041
AU526	5983	C	T	969	4	0.0041
AU526	6328	A	T	482	2	0.0041
AU526	6378	G	A	737	3	0.0041
AU526	6393	T	C	728	3	0.0041
AU526	6533	T	C	488	2	0.0041
AU526	6544	A	G	492	2	0.0041
AU526	6799	A	T	735	3	0.0041
AU526	7109	C	A	245	1	0.0041
AU526	7541	A	G	485	2	0.0041
AU526	7546	T	C	485	2	0.0041
AU526	7554	G	T	482	2	0.0041
AU526	7941	A	T	241	1	0.0041
AU526	7945	A	G	246	1	0.0041
AU526	8178	T	C	491	2	0.0041
AU526	8363	T	A	972	4	0.0041
AU526	8377	C	T	968	4	0.0041
AU526	8434	A	G	736	3	0.0041
AU526	8444	G	A	724	3	0.0041
AU526	8580	A	G	726	3	0.0041
AU526	8886	T	C	738	3	0.0041
AU526	9033	G	A	735	3	0.0041
AU526	9054	G	A	729	3	0.0041
AU526	9197	T	G	486	2	0.0041
AU526	9229	G	T	737	3	0.0041
AU526	9451	G	C	729	3	0.0041
AU526	9847	A	G	1728	7	0.0041
AU526	10144	A	G	1966	8	0.0041
AU526	10160	C	T	2187	9	0.0041
AU526	10284	A	G	3869	16	0.0041
AU526	10423	C	T	2425	10	0.0041
AU526	10448	A	C	1476	6	0.0041
AU526	10791	T	C	491	2	0.0041
AU526	10955	C	T	1216	5	0.0041
AU526	11083	G	T	1223	5	0.0041
AU526	11204	A	G	735	3	0.0041
AU526	11210	T	A	733	3	0.0041
AU526	11216	G	T	739	3	0.0041
AU526	11345	A	T	245	1	0.0041
AU526	11373	T	A	241	1	0.0041
AU526	73	T	C	251	1	0.004
AU526	531	A	G	1256	5	0.004
AU526	1304	T	C	743	3	0.004
AU526	1366	A	G	502	2	0.004
AU526	1371	C	T	495	2	0.004
AU526	2080	C	A	747	3	0.004
AU526	2500	C	A	494	2	0.004
AU526	2814	T	C	1514	6	0.004
AU526	2860	A	G	1236	5	0.004
AU526	3009	G	A	249	1	0.004
AU526	3040	G	T	249	1	0.004
AU526	3248	A	G	751	3	0.004
AU526	3277	T	C	749	3	0.004
AU526	3451	T	A	250	1	0.004
AU526	3453	T	C	247	1	0.004
AU526	3588	A	G	494	2	0.004
AU526	4091	T	C	748	3	0.004
AU526	4141	T	C	755	3	0.004
AU526	4145	T	A	758	3	0.004
AU526	4617	A	T	502	2	0.004
AU526	4638	A	G	501	2	0.004
[truncated: 9,676 more rows]
